# Supplementary material
Source: publisher figshare collection journal article supplement (https://acs.figshare.com/ndownloader/files/11144159)
Supplement: Supplementary file 1 [file 11144159]

## **Supporting Information**

Toward High-performance and Low-cost Hydrogen  
Evolution Reaction Electrocatalysts: Nanostructuring  
Cobalt Phosphide (CoP) Particles on Carbon Fiber Paper

***Shu Hearn Yu, Daniel H.C. Chua\****

*Material Sciences and Engineering Department, National  
University of Singapore. Singapore 117575.*

Correspondence author: Tel: +65-6516-8933, E-mail:  
msechcd@nus.edu.sg

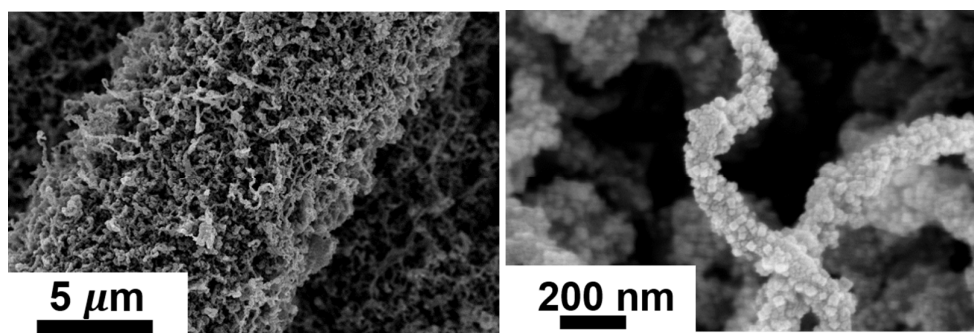

**Figure S1.** The conditions of growing crystalline  $\text{Co}_3\text{O}_4$  nanocubes with size 30-60 nm are the same as growing  $\text{Co}_3\text{O}_4/\text{CFP}$  (150-200 nm) except with a shorter hydrothermal time (4 hrs).

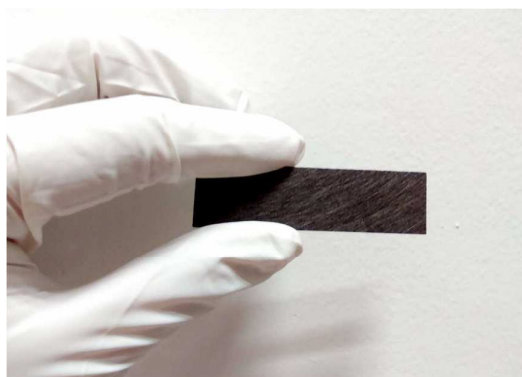

**Figure S2:** The photo shows a HER electrode (1.5 cm x 6 cm) with CoP loaded on carbon fiber paper, suggesting large-scale fabrication is possible.

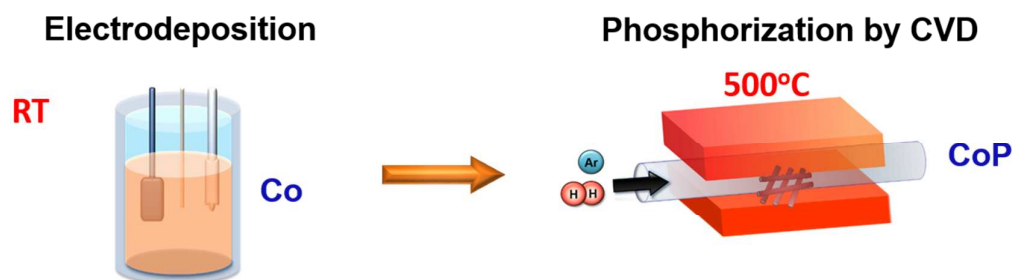

**Figure S3.** The schematic diagram of fabricating CoP by using electrodeposition followed by CVD phosphorization.

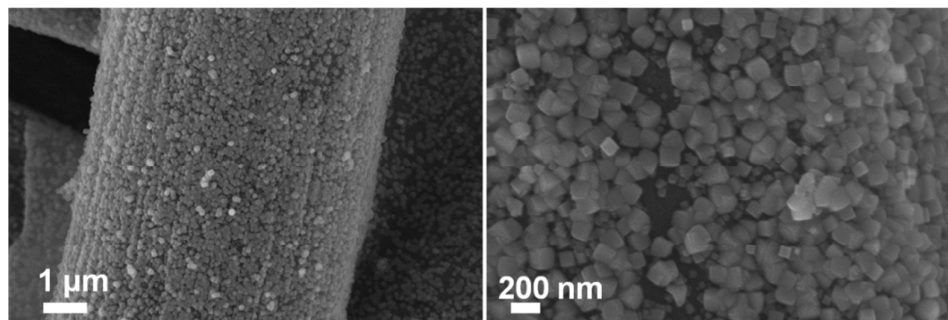

**Figure S4:** As-synthesized cobalt oxide (Co<sub>3</sub>O<sub>4</sub>) by a hydrothermal method. The size of cubic Co<sub>3</sub>O<sub>4</sub> particles is between 150 nm to 200 nm.

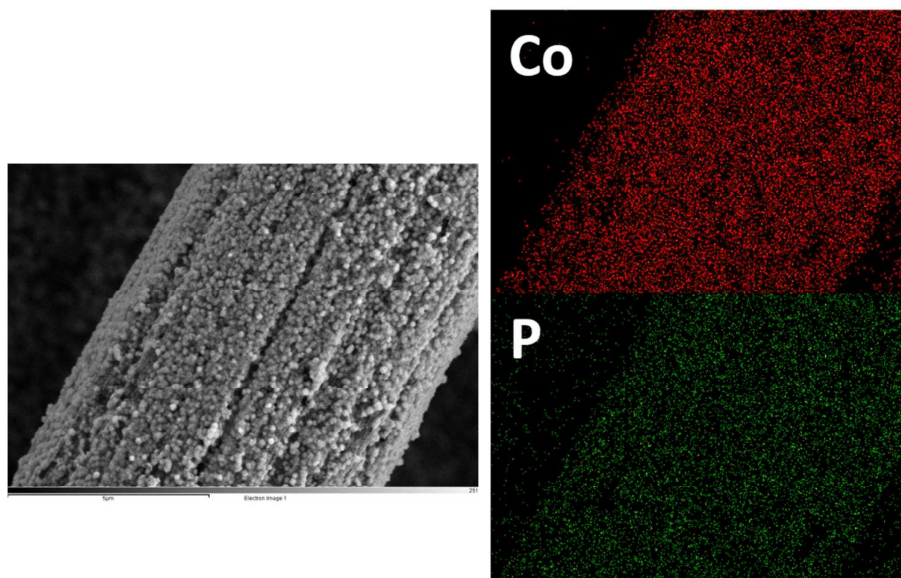

**Figure S5:** EDX element mapping of CoP/CFP-H. It was found that cobalt and phosphorus are evenly distributed.

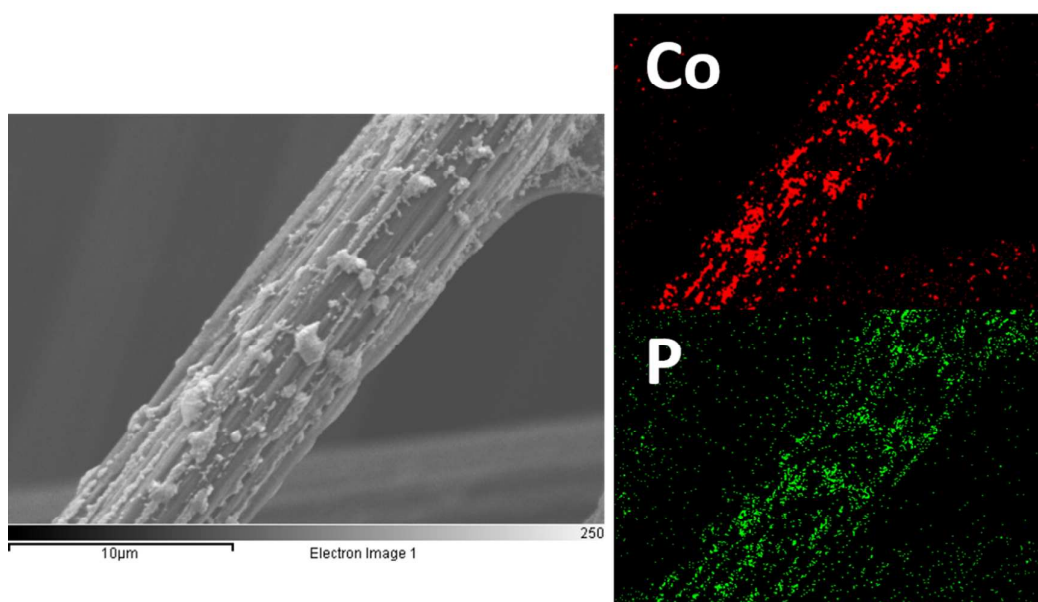

**Figure S6:** EDX element mapping of CoP/CFP-E. It was found that cobalt and phosphorus elements are evenly distributed.

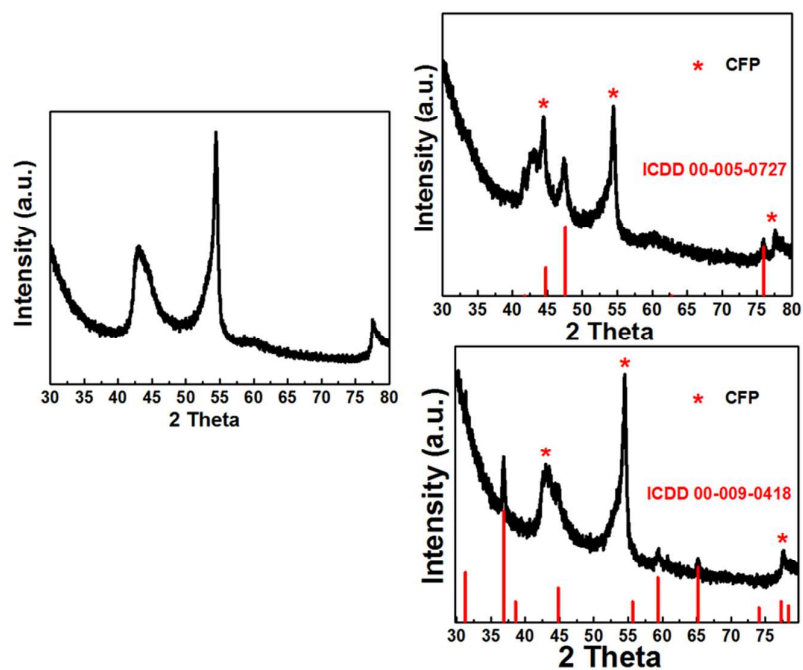

**Figure S7:** XRD of carbon fiber paper,  $\text{Co}_3\text{O}_4/\text{CFP}$  prepared through hydrothermal, and  $\text{Co}/\text{CFP}$  prepared through electrodeposition.

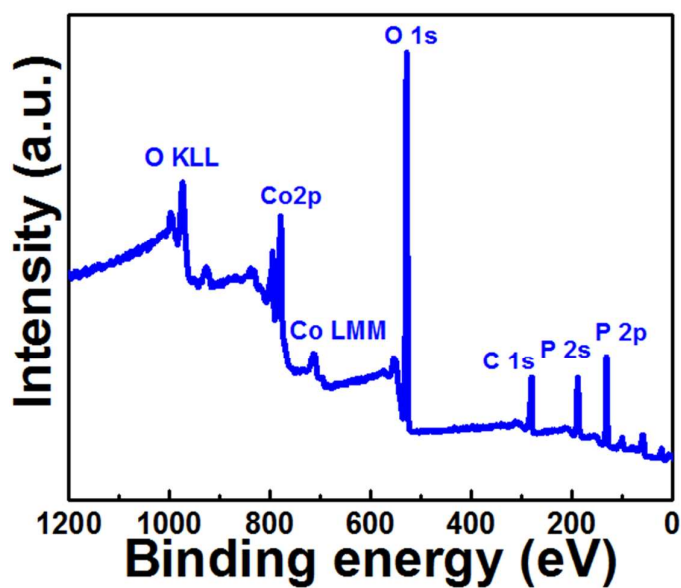

**Figure S8:** Survey scan of  $\text{CoP}/\text{CFP-H}$  shows the presence of Co, P, C and O elements.

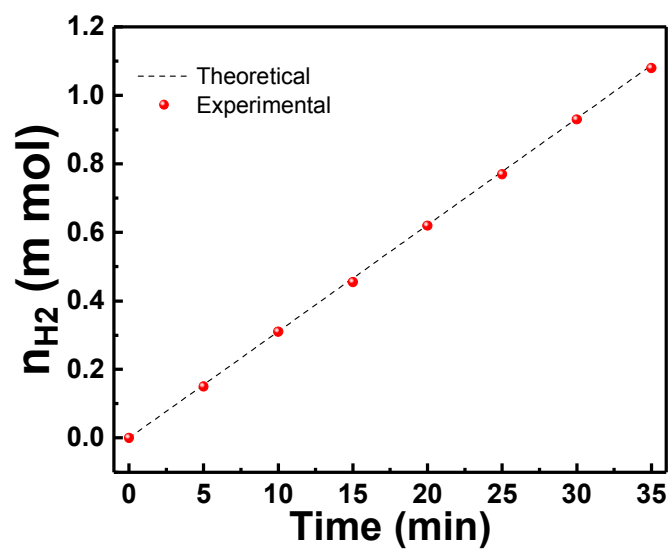

**Figure S9:** The Faradaic efficiency of CoP/CFP-H at cathode current density of  $-100 \text{ mA cm}^{-2}$ .

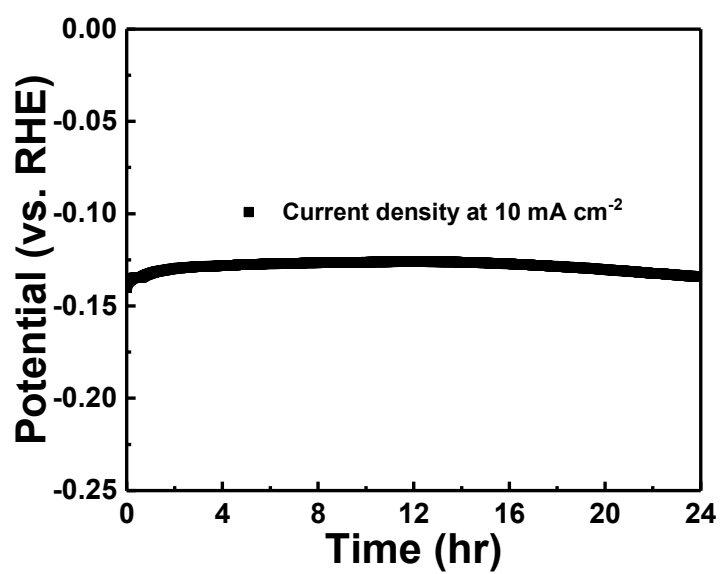

**Figure S10:** The durability test of CoP/CFP-H in chronopotentiometry mode for 24 hours.

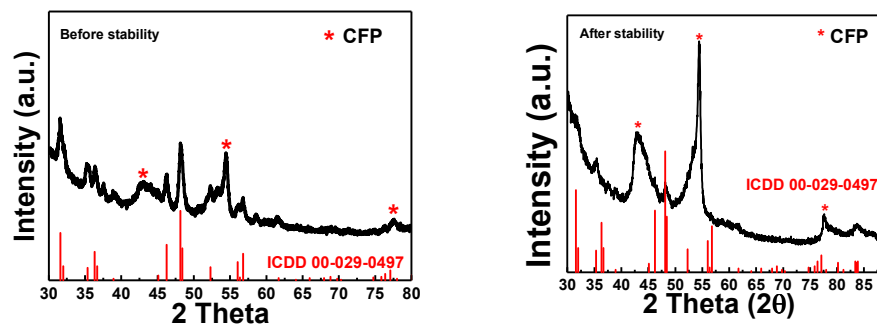

**Figure S11.** The typical XRD of CoP/CFP-H after and stability test for 24 hrs.

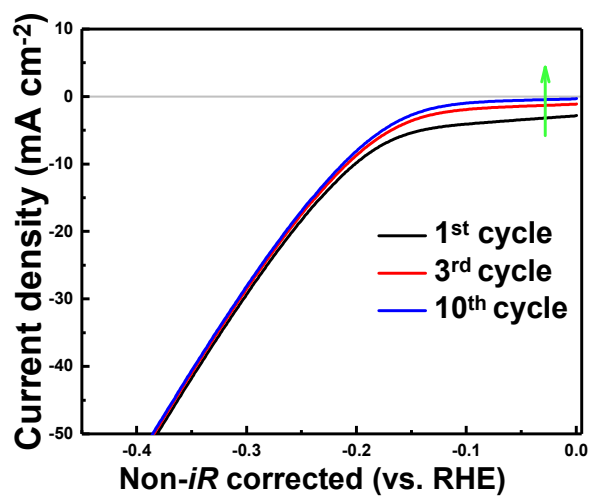

**Figure S12:** LSV of CoP/CFP-H after adding 10 mM NaSCN.

| Electrocatalysts                                                  | Overpotential (mV) |             |              | Tafel slope<br>(mV dec <sup>-1</sup> ) | Synthesis<br>method                                                                                                             | Ref.         |
|-------------------------------------------------------------------|--------------------|-------------|--------------|----------------------------------------|---------------------------------------------------------------------------------------------------------------------------------|--------------|
|                                                                   | $\eta_{10}$        | $\eta_{20}$ | $\eta_{100}$ | <i>b</i>                               |                                                                                                                                 |              |
| CoP/CFP-H<br>(0.3 mg cm <sup>-2</sup> )                           | 128                | 144         | 191          | 49.7                                   | Hydrothermal<br>(IPA) followed by<br>CVD<br>phosphorization                                                                     | This<br>work |
| Metallic MoS2<br>nanosheets<br>(Loading is not given)             | 187                | -           | -            | 43                                     | Chemically<br>exfoliation via<br>lithium<br>intercalation                                                                       | (1)          |
| MoO <sub>3</sub> -MoS <sub>2</sub> /FTO<br>(Loading is not given) | 310                | -           | -            | 50-60                                  | Hot-wire CVD                                                                                                                    | (2)          |
| CoSe <sub>2</sub> /CFP<br>(Loading is not given)                  | 131                | 150         | 181          | 40                                     | Drop casting<br>(DMF) followed by<br>CVD selenization                                                                           | (3)          |
| FeP/Graphene<br>(0.28 mg cm <sup>-2</sup> )                       | 123                | -           | -            | 50                                     | Solvothermal<br>(DMF) followed by<br>CVD<br>phosphorization                                                                     | (4)          |
| CoP on RGO<br>(0.29 mg cm <sup>-2</sup> )                         | > 200              | -           | -            | 104 ~ 149<br>(5 samples)               | Hydrothermal<br>(NH <sub>3</sub> ) followed by<br>CVD<br>phosphorization                                                        | (5)          |
| In situ CoP-CNTs<br>coupling<br>(Not given)                       | 139                | -           | -            | 52                                     | Self-assembly of<br>Co <sub>3</sub> O <sub>4</sub> assisted by<br>MIN solvent & ZIF<br>67 followed by<br>CVD<br>phosphorization | (6)          |
| CoP nanocrystal on CNT<br>(0.285 mg cm <sup>-2</sup> )            | 122                | -           | -            | 54                                     | Hydrothermal<br>(NH <sub>4</sub> OH) followed<br>by CVD<br>phosphorization                                                      | (7)          |
| Co <sub>2</sub> P/Ti<br>(1.0 mg cm <sup>-2</sup> )                | 95                 | 109         | -            | 45                                     | Reflux condenser<br>(1-octadecene,<br>oleyamine, and<br>nonanoic acid)                                                          | (8)          |
| Self-supported CoP<br>nanowire<br>(0.92 mg cm <sup>-2</sup> )     | 67                 | 100         | 204          | 51                                     | Hydrothermal<br>( NH <sub>4</sub> F, urea)<br>followed by CVD<br>phosphorization                                                | (9)          |

**Table S1:** This table lists out the performances of some non-noble catalysts and their synthesis methods.



## References

1. Lukowski MA, Daniel AS, Meng F, Forticaux A, Li L, Jin S. Enhanced hydrogen evolution catalysis from chemically exfoliated metallic MoS<sub>2</sub> nanosheets. *J Am Chem Soc.* 2013;135(28):10274-7.
2. Chen Z, Cummins D, Reinecke BN, Clark E, Sunkara MK, Jaramillo TF. Core-shell MoO<sub>3</sub>-MoS<sub>2</sub> nanowires for hydrogen evolution: a functional design for electrocatalytic materials. *Nano Lett.* 2011;11(10):4168-75.
3. Kong D, Wang H, Lu Z, Cui Y. CoSe<sub>2</sub> nanoparticles grown on carbon fiber paper: an efficient and stable electrocatalyst for hydrogen evolution reaction. *J Am Chem Soc.* 2014;136(13):4897-900.
4. Zhang Z, Lu B, Hao J, Yang W, Tang J. FeP nanoparticles grown on graphene sheets as highly active non-precious-metal electrocatalysts for hydrogen evolution reaction. *Chem Commun (Camb).* 2014;50(78):11554-7.
5. Ma L, Shen X, Zhou H, Zhu G, Ji Z, Chen K. CoP nanoparticles deposited on reduced graphene oxide sheets as an active electrocatalyst for the hydrogen evolution reaction. *Journal of Materials Chemistry A.* 2015;3(10):5337-43.
6. Wu C, Yang Y, Dong D, Zhang Y, Li J. In Situ Coupling of CoP Polyhedrons and Carbon Nanotubes as Highly Efficient Hydrogen Evolution Reaction Electrocatalyst. *Small.* 2017;13(15).
7. Liu Q, Tian J, Cui W, Jiang P, Cheng N, Asiri AM, et al. Carbon nanotubes decorated with CoP nanocrystals: a highly active non-noble-metal nanohybrid electrocatalyst for hydrogen evolution. *Angew Chem Int Ed Engl.* 2014;53(26):6710-4.
8. Callejas JF, Read CG, Popczun EJ, McEnaney JM, Schaak RE. Nanostructured Co<sub>2</sub>P Electrocatalyst for the Hydrogen Evolution Reaction and Direct Comparison with Morphologically Equivalent CoP. *Chemistry of Materials.* 2015;27(10):3769-74.
9. Tian J, Liu Q, Asiri AM, Sun X. Self-supported nanoporous cobalt phosphide nanowire arrays: an efficient 3D hydrogen-evolving cathode over the wide range of pH 0-14. *J Am Chem Soc.* 2014;136(21):7587-90.
